# Supplementary material for: Generation of a 4-crossing [2]-catenane motif by the 2D→2D parallel interpenetration of pairs of (4,4) sheets
Source: Royal Society of Chemistry journal article supplement (doi:10.1039/b808540b), 2008-01-01
Supplement: b808540b.pdf [file b808540b.pdf]

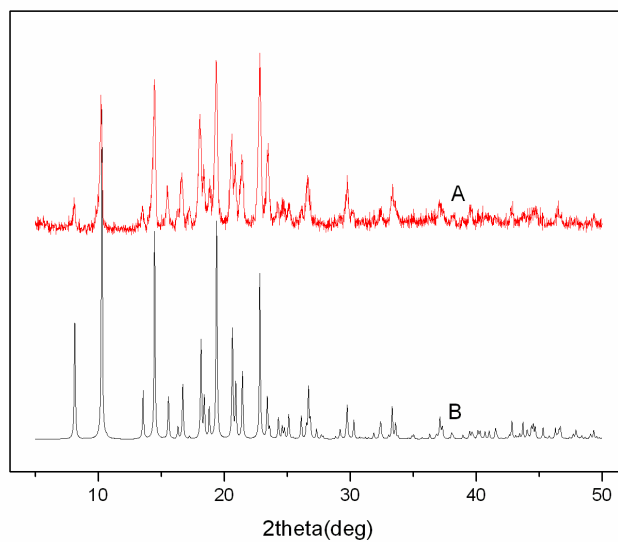

**Figure S1.** (A) Experimental PXRD pattern of a fresh bulk sample of **1**; (B) simulated PXRD pattern calculated from the **single crystal XRD data** for **1**.

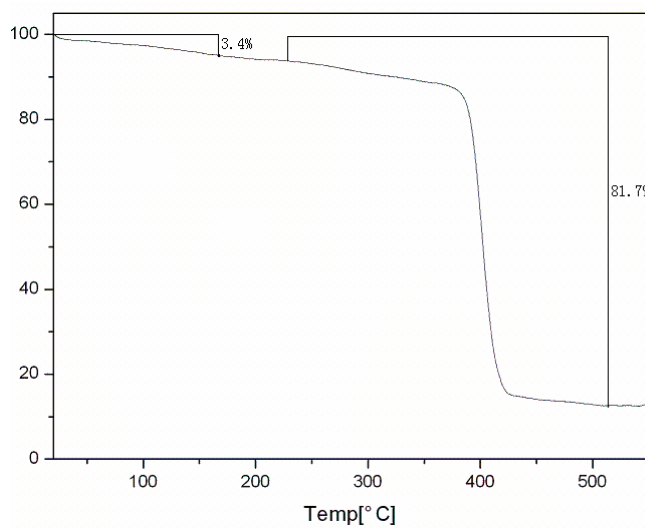

**Figure S2** Thermogravimetric analysis curve of **1**.
